# Supplementary material for: Development of Oncolytic Vectors Based on Human Adenovirus Type 6 for Cancer Treatment
Source: MDPI journal article supplement (doi:10.3390/v15010182), 2023-01-07
Supplement: s1 [file s1]

**Table S1. Primers and probes used in the study**

| <b>№</b> | <b>Primer name</b> | <b>Sequence 5' → 3'</b>                            |
|----------|--------------------|----------------------------------------------------|
| 1        | Ad6-LITR-for       | TTCGTCTTCAAGAATTGCGATCGCATCATCAATAATATACCTTATTTTGG |
| 2        | Ad6-LITR-rev       | TCACCTCCTAACACAAACTCCTCACCCCTCTTC                  |
| 3        | Ad6-RITR-for       | TTGTGTTAGGAGGTGAGCTCAACTCC                         |
| 4        | Ad6-RITR-rev       | TACCGCATTAAAGCTGCGATCGCATCATCAATAATATACCTTATTTTG   |
| 5        | pShuttle-TERT-for  | CGCGCTGCAGGCCACCATGAGACATATTATCTGCCAC              |
| 6        | pShuttle-TERT-rev  | AATCGGATCCGCGGCCCTAGACAA                           |
| 7        | TERT-pShuttle-for  | GGCCGCGGATCCGATTCGACCTCTCTC                        |
| 8        | TERT-pShuttle-rev  | TGGTGGCCTGCAGCGCGGGGGTGGCCG                        |
| 9        | pShuttle-GMCSF-for | GTGAAGCTATTTTCCGCTTGCTTGTATTC                      |
| 10       | pShuttle-GMCSF-rev | TGCAGCCACATATACTTAATTAATAATCCACG                   |
| 11       | GMCSF-pShuttle-for | AGTATATGTGGCTGCAGAGCCTG                            |
| 12       | GMCSF-pShuttle-rev | CGGAAAATAGCTTCACTCCTGGACTG                         |
| 13       | pShuttle-ClaI-Ad6  | GTGCTGGGATTTTTTAATTAAGTATATGTGG                    |
| 14       | pShuttle-PacI-Ad6  | GTGGCAGGTAAGATCGATCACCT                            |
| 15       | E3for              | CAGTTTATTCCCAACTTTGACGC                            |
| 16       | TPL3for            | CGTCTAACCAGTCACAGTCG                               |
| 17       | GMCSFrev           | CAAGAGCAGCAGGCTCTG                                 |
| 18       | 6.7rev             | CAAGCTTGTAGAGTTACTTGAATTG                          |
| 19       | ADPrev             | GTTGTGGGCGCGATGGTT                                 |
| 20       | Probe              | (Cy5)-CTGCCGGAACGTACGAGTGCCT -(BHQ2)               |
| 21       | GAPDHfor           | GACAGTCAGCCGCATCTTCT                               |
| 22       | GAPDHrev           | TTAAAAGCAGCCCTGGTGAC                               |
| 23       | GAPDHprobe         | (Cy5)-CGTCGCCAGCCGAGCCACATC -(BHQ2)                |
| 24       | E4for              | GGAGTGCGCCGAGACAAC                                 |
| 25       | E4rev              | ACTACGTCCGGCGTTCCAT                                |
| 26       | E4probe            | (Cy5)-TGGCATGACACTACGACCAACACGATCT-(BHQ2)          |
